# Supplementary material
Source: Springer Nature journal article supplement (https://www.springermedizin.de/resource/supplementary/12947_2011_436_MOESM4_ESM.pdf/9555762)

# Central systolic blood pressure of the HCD, HNCD and CT groups

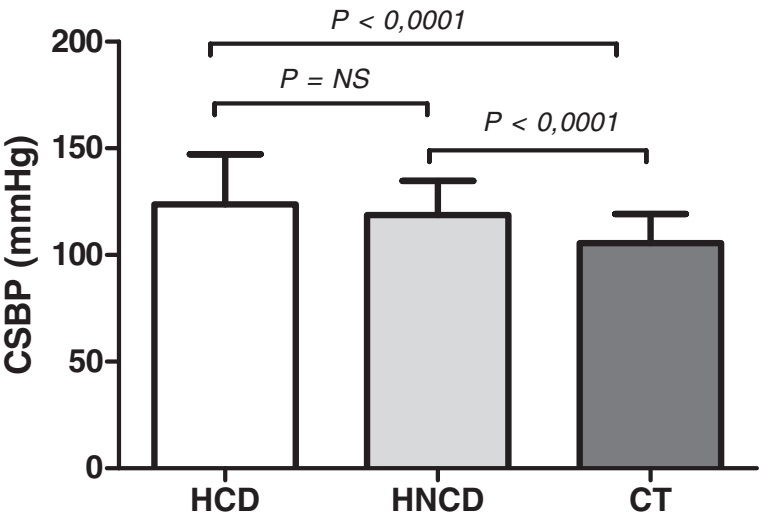

Supplement: MOESM4 [file 9555762]
